# Supplementary material for: ELMO2 association with G α i2 regulates pancreatic cancer cell chemotaxis and metastasis
Source: PeerJ journal article supplement (doi:10.7717/peerj.8910), 2020-04-06
Supplement: Supplemental_Data_&_Figure_S1.zip [file adhesion_aspc_1.xls]

## Sheet: adhesion_aspc
	Si-ELMO2			Normal			Control
0ng	0.23351	0.41821	0.30793	0.38987	0.39821	0.39961	0.37331	0.40291	0.37859			0ng	10ng	100ng	1000ng
10ng	0.32361	0.31861	0.33223	0.55269	0.38808	0.45605	0.47518	0.41658	0.43408		si	0.31989	0.32481	0.49123	0.46382
100ng	0.44952	0.53305	0.49111	0.79696	0.86765	0.81074	0.80962	0.79543	0.79451		Normal	0.39589	0.46561	0.82512	0.49421
1000ng	0.38745	0.51725	0.48676	0.46581	0.48972	0.52711	0.46632	0.51067	0.44352		Control	0.38494	0.44195	0.79985	0.47352
	Si-ELMO2			Normal			Control
0ng	0.20784	0.21904	0.28516	0.22124	0.22623	0.21955	0.21348	0.22708	0.23198			0ng	10ng	100ng	1000ng
10ng	0.34891	0.34392	0.34486	0.44847	0.42578	0.43013	0.40333	0.43649	0.41661		si	0.23735	0.34589	0.54335	0.43825
100ng	0.56293	0.54261	0.52453	0.85206	0.89062	0.87427	0.85212	0.82794	0.83416		Normal	0.22234	0.43479	0.87231	0.55177
1000ng	0.42987	0.45102	0.43388	0.54129	0.54455	0.56949	0.53354	0.51582	0.52181		Control	0.22418	0.41881	0.83807	0.52372
	Si-ELMO2			Normal			Control
0ng	0.21642	0.20655	0.21914	0.22154	0.24871	0.23287	0.23239	0.23872	0.21779			0ng	10ng	100ng	1000ng
10ng	0.31534	0.32874	0.29685	0.42771	0.35919	0.33893	0.32727	0.38427	0.37325		si	0.21403	0.31364	0.51864	0.37177
100ng	0.53683	0.51456	0.50453	0.78525	0.73255	0.73843	0.64122	0.65519	0.64455		Normal	0.23437	0.37528	0.75208	0.58204
1000ng	0.38397	0.36672	0.36462	0.575028	0.58353	0.58755	0.56701	0.54283	0.569967		Control	0.22963	0.3616	0.64699	0.55994
