# Supplementary material for: ELMO2 association with G α i2 regulates pancreatic cancer cell chemotaxis and metastasis
Source: PeerJ journal article supplement (doi:10.7717/peerj.8910), 2020-04-06
Supplement: Supplemental_Data_&_Figure_S1.zip [file adhesion_panc_1.xls]

## Sheet: adhesion_panc
	si-ELMO2			Normal			Control
0ng	0.21433	0.20915	0.23237	0.26386	0.28103	0.31302	0.24656	0.26482	0.31987			0ng	10ng	100ng	1000ng
10ng	0.35962	0.28582	0.31474	0.35539	0.415498	0.43116	0.44816	0.35094	0.37326		si	0.21862	0.32005	0.46612	0.44959
100ng	0.45414	0.44821	0.49601	0.82255	0.80822	0.79232	0.78654	0.78459	0.80715		Normal	0.28597	0.40068	0.80771	0.54344
1000ng	0.44415	0.42449	0.48011	0.50525	0.53346	0.59162	0.58471	0.43001	0.58553		Control	0.27709	0.39079	0.79276	0.53342
	si-ELMO2			Normal			Control
0ng	0.21915	0.21015	0.21679	0.25029	0.24738	0.23465	0.22714	0.23905	0.22029			0ng	10ng	100ng	1000ng
10ng	0.26736	0.26504	0.26052	0.28773	0.30471	0.34063	0.27748	0.27854	0.29231		si	0.21536	0.26431	0.54428	0.44946
100ng	0.56029	0.52655	0.54601	0.79673	0.77484	0.78545	0.71779	0.73873	0.74976		Normal	0.24411	0.31102	0.78567	0.64981
1000ng	0.46866	0.45257	0.42714	0.65039	0.66757	0.63147	0.63796	0.62381	0.64736		Control	0.22883	0.28278	0.73543	0.63638
	si-ELMO2			Normal			Control
0ng	0.21707	0.21101	0.20866	0.24577	0.23006	0.24203	0.23276	0.24209	0.22309			0ng	10ng	100ng	1000ng
10ng	0.38495	0.36432	0.40864	0.48206	0.49274	0.42836	0.42771	0.43232	0.45062		si	0.21225	0.38597	0.52446	0.44636
100ng	0.50974	0.57003	0.49362	0.80642	0.75843	0.79738	0.71028	0.70522	0.75538		Normal	0.23929	0.46772	0.78741	0.58744
1000ng	0.45318	0.44838	0.43753	0.59079	0.58503	0.58651	0.49034	0.48428	0.51582		Control	0.23265	0.43688	0.72363	0.49681
