# Supplementary material for: ELMO2 association with G α i2 regulates pancreatic cancer cell chemotaxis and metastasis
Source: PeerJ journal article supplement (doi:10.7717/peerj.8910), 2020-04-06
Supplement: Supplemental_Data_&_Figure_S1.zip [file AsPC-1.xlsx]

## Sheet: Sheet1
	Si-ELMO2			Normal			Control
0ng	17	21	19	35	23	27	30	24	33
10ng	28	23	29	49	48	52	43	47	42
100ng	63	61	66	123	117	112	113	107	116
1000ng	42	47	43	95	93	84	86	89	91
	Si-ELMO2			Normal			Control
0ng	25	23	20	36	40	37	31	39	35
10ng	37	33	41	81	75	83	79	70	77
100ng	83	77	80	178	180	169	136	145	139
1000ng	64	58	69	114	121	111	105	109	100
	Si-ELMO2			Normal			Control
0ng	35	33	37	58	63	60	53	56	57
10ng	48	40	43	93	89	80	74	69	73
100ng	79	87	63	127	130	127	108	110	117
1000ng	51	54	42	84	82	79	72	76	77
