# Supplementary material for: ELMO2 association with G α i2 regulates pancreatic cancer cell chemotaxis and metastasis
Source: PeerJ journal article supplement (doi:10.7717/peerj.8910), 2020-04-06
Supplement: Supplemental_Data_&_Figure_S1.zip [file aspc_1.xlsx]

## Sheet: Sheet1
	siELMO2			Normal			Control
0ng	10	11	8	18	27	24	21	24	20
10ng	19	22	24	39	33	40	36	41	33
100ng	33	36	32	77	84	82	73	72	79
1000ng	20	18	24	51	49	48	49	39	37
	siElmo2			Normal			Control
0ng	8	12	9	25	21	29	19	17	22
10ng	23	21	22	40	37	32	34	28	27
100ng	27	33	36	76	83	79	72	70	66
1000ng	31	29	25	47	50	52	41	44	43
	siElmo2			Normal			Control
0ng	13	11	11	28	23	21	18	19	22
10ng	18	22	19	39	35	37	34	30	29
100ng	35	31	34	76	75	80	78	67	71
1000ng	28	27	30	44	51	53	37	38	40
