# Supplementary material for: ELMO2 association with G α i2 regulates pancreatic cancer cell chemotaxis and metastasis
Source: PeerJ journal article supplement (doi:10.7717/peerj.8910), 2020-04-06
Supplement: Supplemental_Data_&_Figure_S1.zip [file F-actin-AsPC-1.xls]

## Sheet: F_actin_aspc
		Si-Elmo2			Normal			Control
F-actin 0	0s	3.00423	3.14606	2.95543	4.15874	4.1203	4.16602	4.21135	4.15426	3.98037
F-actin t	4s	3.01175	3.36574	3.56658	5.06661	5.02648	4.94415	5.01343	5.20292	4.84059
F-actin t	8s	3.67587	3.39154	3.59403	5.4087	5.27128	5.32739	5.17758	5.05992	4.65588
F-actin t	15s	3.75753	3.8518	2.94087	6.87697	6.53212	6.19792	6.86598	6.13436	6.26859
F-actin t	30s	4.56131	3.8295	4.42511	8.01234	7.09389	7.24466	7.78651	7.30588	7.22354
F-actin t	60s	4.06686	4.51266	5.15644	6.7287	7.01307	6.07336	6.34033	6.96652	6.20559
F-actin t	120s	4.67007	4.53717	3.92469	7.40851	7.81886	6.99511	7.25537	7.02073	7.90847
F-actin t	300s	3.63993	3.39022	3.79531	6.60465	5.90627	4.79788	5.31998	5.23886	6.57948
		Si-Elmo2			Normal			Control
F-actin 0	0s	2.97042	3.01768	3.01175	3.92796	3.88498	3.82553	3.47707	3.50631	3.4962
F-actin t	4s	3.05344	3.07695	3.06101	4.50281	4.35011	4.57196	3.97251	4.05654	3.89326
F-actin t	8s	3.15271	3.18069	3.17695	5.26913	4.90985	4.78172	4.10821	4.34422	4.33792
F-actin t	15s	3.47702	3.27736	3.30256	5.75086	5.74013	5.37844	4.96433	4.80974	5.16622
F-actin t	30s	4.15325	4.49619	4.16501	7.25483	7.31826	7.07756	6.20574	6.58301	6.33056
F-actin t	60s	3.81959	4.09279	4.10134	6.71239	6.80425	6.62297	5.97732	6.08039	5.82017
F-actin t	120s	3.62931	3.84056	3.74681	6.87196	6.72713	6.94685	6.31927	6.16754	6.14789
F-actin t	300s	3.27956	3.15629	3.20209	5.44751	5.69486	5.72372	4.95266	4.83589	5.08394
		Si-Elmo2			Normal			Control
F-actin 0	0s	3.09504	3.05203	3.10457	3.56073	3.67806	3.46073	3.39772	3.20305	3.30102
F-actin t	4s	3.11907	3.15756	3.13839	4.28206	4.02983	4.11756	3.83921	3.84976	3.89171
F-actin t	8s	3.23823	3.22306	3.38392	4.37807	4.96517	4.70078	4.01607	4.19468	4.42983
F-actin t	15s	3.45322	3.25754	3.26821	5.39669	5.44567	5.25754	4.83371	5.24648	5.04006
F-actin t	30s	3.71583	3.78056	3.82248	6.85816	6.82842	6.65594	6.03618	5.95736	6.05411
F-actin t	60s	3.80472	4.00461	4.39263	5.77952	6.13839	6.22336	5.14377	5.54101	5.72551
F-actin t	120s	4.43461	4.36381	4.23484	6.26821	6.24649	6.65172	5.83854	5.84785	5.74631
F-actin t	300s	3.52318	3.64288	3.63184	4.82837	5.35834	5.09652	4.48102	4.68899	4.64716
