# Supplementary material for: ELMO2 association with G α i2 regulates pancreatic cancer cell chemotaxis and metastasis
Source: PeerJ journal article supplement (doi:10.7717/peerj.8910), 2020-04-06
Supplement: Supplemental_Data_&_Figure_S1.zip [file F-actin-Panc-1.xls]

## Sheet: F_actin_panc
	Time	Si-Elmo2			Normal			Control
F-actin 0	0s	2.59057	3.27433	2.95535	4.15282	3.98616	5.29685	2.84886	3.48707	3.03851
F-actin t	4s	3.23853	3.54283	2.82529	3.38909	3.40134	3.9483	3.14268	3.4287	4.12472
F-actin t	8s	3.1805	3.55716	3.31051	5.93234	5.8354	5.79115	3.67929	3.97693	4.80188
F-actin t	15s	3.30927	3.64893	3.58163	6.92945	7.02557	7.41154	5.14409	5.16972	4.84986
F-actin t	30s	4.88975	4.08967	3.17075	8.23463	7.78605	8.23138	5.64641	5.39686	5.61211
F-actin t	60s	4.40009	5.07796	4.61498	7.27024	7.28043	6.96001	5.19984	4.85885	4.94822
F-actin t	120s	5.08545	4.12786	4.31262	8.21954	8.05418	7.85643	5.58595	5.64097	5.28219
F-actin t	300s	3.50663	3.60101	3.45537	6.48294	6.12233	5.97445	4.30891	4.61538	3.91256
		Si-Elmo2			Normal			Control
F-actin 0	0s	3.13761	3.18277	3.23897	3.23293	3.24409	3.45843	3.12203	3.35071	3.21172
F-actin t	4s	3.36683	3.20952	3.44083	3.98018	4.08288	4.09518	3.87461	3.88806	3.73408
F-actin t	8s	3.37365	3.52049	3.25249	4.24341	4.22572	4.38551	3.99939	4.02373	4.02291
F-actin t	15s	3.33146	3.79835	3.89017	4.93779	5.21675	5.16164	5.13616	5.22856	5.11837
F-actin t	30s	4.40266	4.29278	4.32533	6.21752	5.64418	5.61945	5.71991	5.46855	5.44293
F-actin t	60s	4.50744	4.42341	4.58542	5.47091	5.37522	5.32568	5.10537	5.13793	5.15889
F-actin t	120s	4.35904	4.35867	4.39667	5.84561	5.85687	5.83034	5.64331	5.78502	5.76952
F-actin t	300s	3.89667	4.07658	3.75296	4.59141	4.78993	4.32199	4.33116	4.50314	4.36626
		Si-Elmo2			Normal			Control
F-actin 0	0s	2.84507	2.95295	2.97386	3.13037	3.25868	3.21948	3.14742	3.04572	3.01818
F-actin t	4s	3.15395	3.13964	3.20453	4.08476	4.06678	3.92286	3.88137	3.49006	3.65824
F-actin t	8s	3.24017	3.45473	3.40183	4.35731	4.34892	4.23076	3.87368	3.80257	3.90213
F-actin t	15s	3.53276	3.50673	3.39028	4.97419	4.82525	4.68483	4.36209	4.46116	4.78219
F-actin t	30s	4.36622	4.39028	4.07748	5.63297	5.67634	5.80445	5.48553	5.37121	5.57389
F-actin t	60s	4.26068	4.61372	4.63545	5.40214	5.18025	5.09229	4.79597	5.01196	4.83142
F-actin t	120s	4.15102	4.13726	4.07446	5.58044	5.76192	5.48292	5.51367	5.15757	5.08738
F-actin t	300s	3.61503	3.59694	3.44862	4.65334	4.66789	4.63461	4.31475	4.29857	4.35977
