# Supplementary material for: ELMO2 association with G α i2 regulates pancreatic cancer cell chemotaxis and metastasis
Source: PeerJ journal article supplement (doi:10.7717/peerj.8910), 2020-04-06
Supplement: Supplemental_Data_&_Figure_S1.zip [file Panc-1.xlsx]

## Sheet: Sheet1
	Si-ELMO2			Normal			Control
0ng	14	15	13	33	30	34	31	30	32
10ng	30	34	41	55	58	53	54	52	57
100ng	84	81	88	124	127	130	132	133	131
1000ng	48	45	43	107	106	104	93	94	99
	Si-ELMO2			Normal			Control
0ng	21	17	19	35	29	37	30	27	25
10ng	39	42	44	63	59	64	60	57	55
100ng	82	76	89	144	140	136	134	137	140
1000ng	52	51	47	100	98	97	89	91	94
	Si-ELMO2			Normal			Control
0ng	23	20	18	31	28	26	29	25	26
10ng	45	43	46	70	77	69	72	67	75
100ng	80	72	83	160	169	166	152	159	156
1000ng	64	59	61	110	108	114	97	101	105
