# Supplementary material for: ELMO2 association with G α i2 regulates pancreatic cancer cell chemotaxis and metastasis
Source: PeerJ journal article supplement (doi:10.7717/peerj.8910), 2020-04-06
Supplement: Supplemental_Data_&_Figure_S1.zip [file panc_1.xlsx]

## Sheet: Sheet1
	Si-Elmo2			Normal			control
0ng	11	9	14	22	20	25	21	20	24
10ng	22	27	23	39	38	33	30	36	34
100ng	36	35	39	77	82	80	75	79	73
1000ng	18	24	20	55	49	46	51	40	47
	Si-Elmo2			Normal			Control
0ng	13	14	17	20	18	24	17	21	19
10ng	22	25	20	39	37	41	32	30	27
100ng	37	34	39	79	76	81	70	67	72
1000ng	27	26	29	49	51	52	43	45	40
	Si-Elmo2			Normal			Control
0ng	12	16	13	22	21	19	18	20	21
10ng	20	21	24	35	36	37	33	29	34
100ng	31	33	34	76	69	73	74	70	68
1000ng	25	26	23	52	47	50	48	42	46
