# Supplementary material for: ELMO2 association with G α i2 regulates pancreatic cancer cell chemotaxis and metastasis
Source: PeerJ journal article supplement (doi:10.7717/peerj.8910), 2020-04-06
Supplement: Supplemental_Data_&_Figure_S1.zip [file scratching_aspc.xlsx]

## Sheet: Sheet1
	Si-Elom2			Normal			Control
0h	0	0	0	0	0	0	0	0	0	(mm)
3h	0.045397	0.035284	0.0361458	0.074473	0.084927	0.082796	0.061319	0.072811	0.079783
6h	0.050833	0.051433	0.059308	0.144506	0.166986	0.182182	0.145019	0.148942	0.115857
9h	0.059576	0.08218	0.071541	0.242312	0.245207	0.284705	0.219798	0.209344	0.245439
12h	0.097345	0.10833	0.09335	0.317392	0.325223	0.303061	0.278448	0.225336	0.293067
24h	0.107761	0.114511	0.105156	0.387306	0.41167	0.369723	0.321756	0.32147	0.316563
	Si-Elom2			Normal			Control
0h	0	0	0	0	0	0	0	0	0	(mm)
3h	0.035762	0.03279	0.033843	0.076621	0.073902	0.079566	0.074015	0.07209	0.074119
6h	0.043771	0.039775	0.0416723	0.142791	0.162427	0.179862	0.145831	0.129709	0.138312
9h	0.107283	0.097502	0.100402	0.249798	0.258799	0.269332	0.220359	0.210419	0.209704
12h	0.147086	0.139691	0.148669	0.315496	0.319947	0.322585	0.305531	0.292287	0.283048
24h	0.164502	0.15682	0.167419	0.395189	0.405808	0.410613	0.347502	0.347887	0.337473
	Si-Elom2			Normal			Control
0h	0	0	0	0	0	0	0	0	0	(mm)
3h	0.028182	0.02923	0.031211	0.077378	0.073556	0.074474	0.076755	0.072567	0.071485
6h	0.034336	0.033652	0.032588	0.198217	0.182176	0.178127	0.135925	0.134791	0.133793
9h	0.110701	0.093123	0.109437	0.252067	0.250732	0.249109	0.211594	0.201861	0.198358
12h	0.151064	0.148294	0.152641	0.340181	0.332643	0.313772	0.313035	0.299034	0.298302
24h	0.170117	0.162134	0.17611	0.435861	0.403564	0.384372	0.373653	0.323724	0.344883
