# Supplementary material for: ELMO2 association with G α i2 regulates pancreatic cancer cell chemotaxis and metastasis
Source: PeerJ journal article supplement (doi:10.7717/peerj.8910), 2020-04-06
Supplement: Supplemental_Data_&_Figure_S1.zip [file scratching_panc.xlsx]

## Sheet: Sheet1
	Si-ELmo2			Normal			Control
0h	0	0	0	0	0	0	0	0	0	(mm)
3h	0.018158	0.026592	0.022246	0.070807	0.07091	0.069938	0.059968	0.053901	0.055871
6h	0.048884	0.039089	0.043199	0.144782	0.177469	0.163112	0.131151	0.10949	0.12199
9h	0.083686	0.081003	0.081253	0.218674	0.23961	0.229774	0.169842	0.205871	0.187462
12h	0.123874	0.122253	0.129771	0.325854	0.297484	0.311606	0.245733	0.279342	0.312491
24h	0.127207	0.138631	0.132081	0.368421	0.389882	0.378826	0.288702	0.321008	0.360102
	Si-ELmo2			Normal			Control
0h	0	0	0	0	0	0	0	0	0	(mm)
3h	0.022462	0.019741	0.023366	0.069491	0.076462	0.074873	0.061752	0.053484	0.057819
6h	0.042473	0.041612	0.047271	0.159491	0.162341	0.160172	0.121993	0.150713	0.132724
9h	0.081253	0.082897	0.083638	0.217719	0.190337	0.249351	0.189769	0.198852	0.203829
12h	0.128147	0.101162	0.110703	0.312453	0.343391	0.349843	0.294621	0.307091	0.287051
24h	0.130517	0.120337	0.121201	0.391296	0.381172	0.425942	0.351948	0.368661	0.331297
	Si-ELmo2			Normal			Control
0h	0	0	0	0	0	0	0	0	0	(mm)
3h	0.020274	0.018901	0.024379	0.07416	0.071566	0.075383	0.063172	0.055049	0.054941
6h	0.040867	0.041903	0.042053	0.161915	0.163901	0.167924	0.133778	0.127785	0.141771
9h	0.079839	0.082857	0.084809	0.258473	0.248126	0.223936	0.209151	0.191046	0.199883
12h	0.118194	0.12027	0.127917	0.347871	0.33755	0.329616	0.290406	0.288013	0.302241
24h	0.129461	0.131651	0.134624	0.414302	0.406582	0.392554	0.349079	0.359321	0.360285
